# Supplementary material for: Biomass-mediated synthesis of carbon-supported nanostructured metal sulfides for ultra-high performance lithium-ion batteries
Source: Royal Society of Chemistry journal article supplement (doi:10.1039/c5ta09917j), 2016-01-01
Supplement: c5ta09917j1.pdf [file c5ta09917j1.pdf]

## Supporting Information

### Biomass-mediated synthesis of carbon-supported nanostructured metal sulfides for ultra-high performance Lithium-ion batteries

*Y. Lu and E. Fong\**

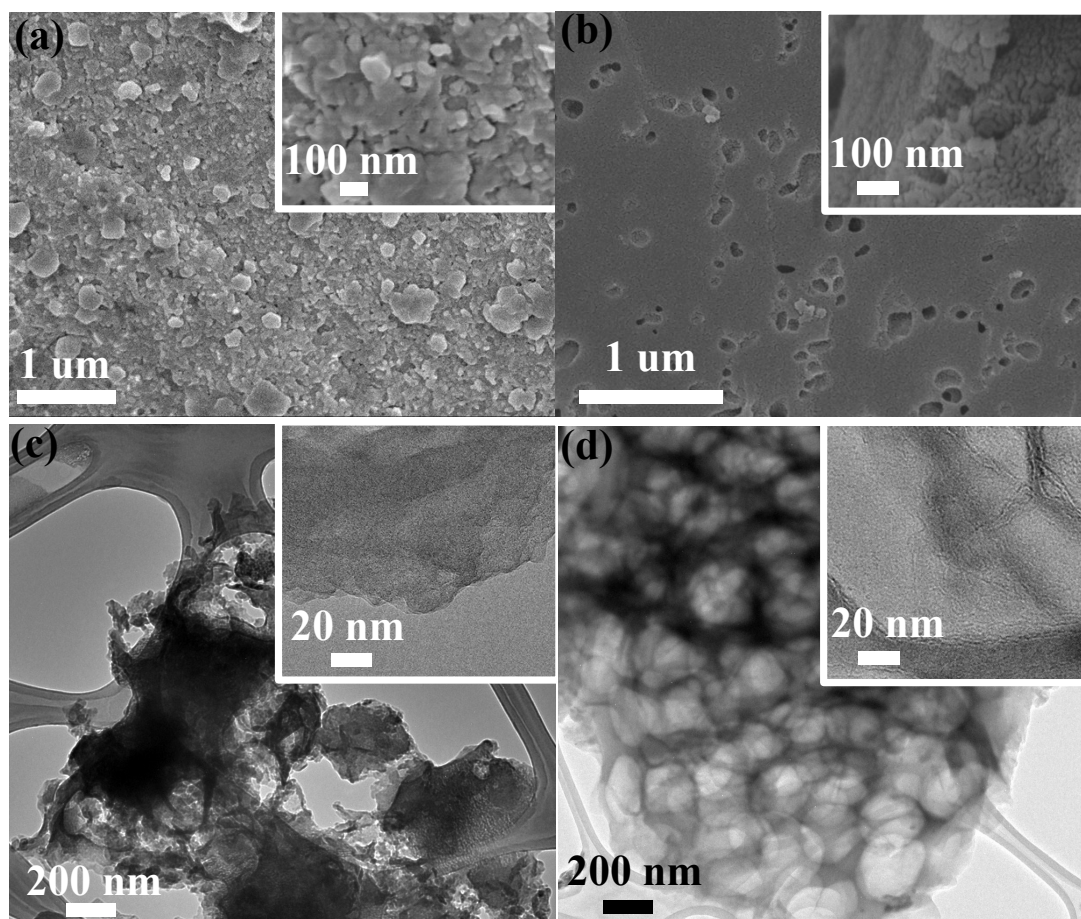

Fig. S1. SEM image of alginate after annealing (a) and alginate containing L-cysteine after annealing (b); (c – d) TEM image of sample in (a) and (b) respectively.

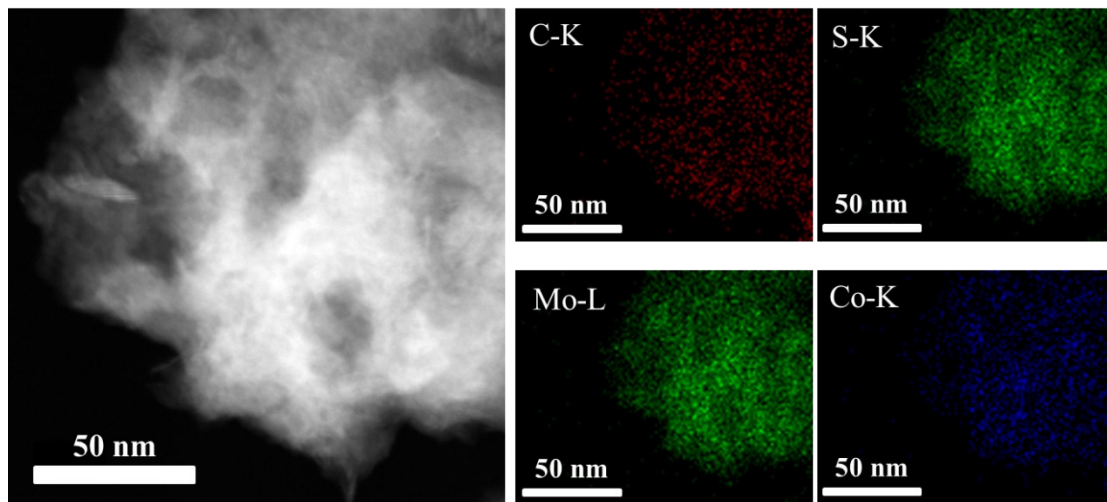

Fig. S2. TEM element mapping of annealed  $\text{CoMoS}_{3.13}\text{@ADC}$ .

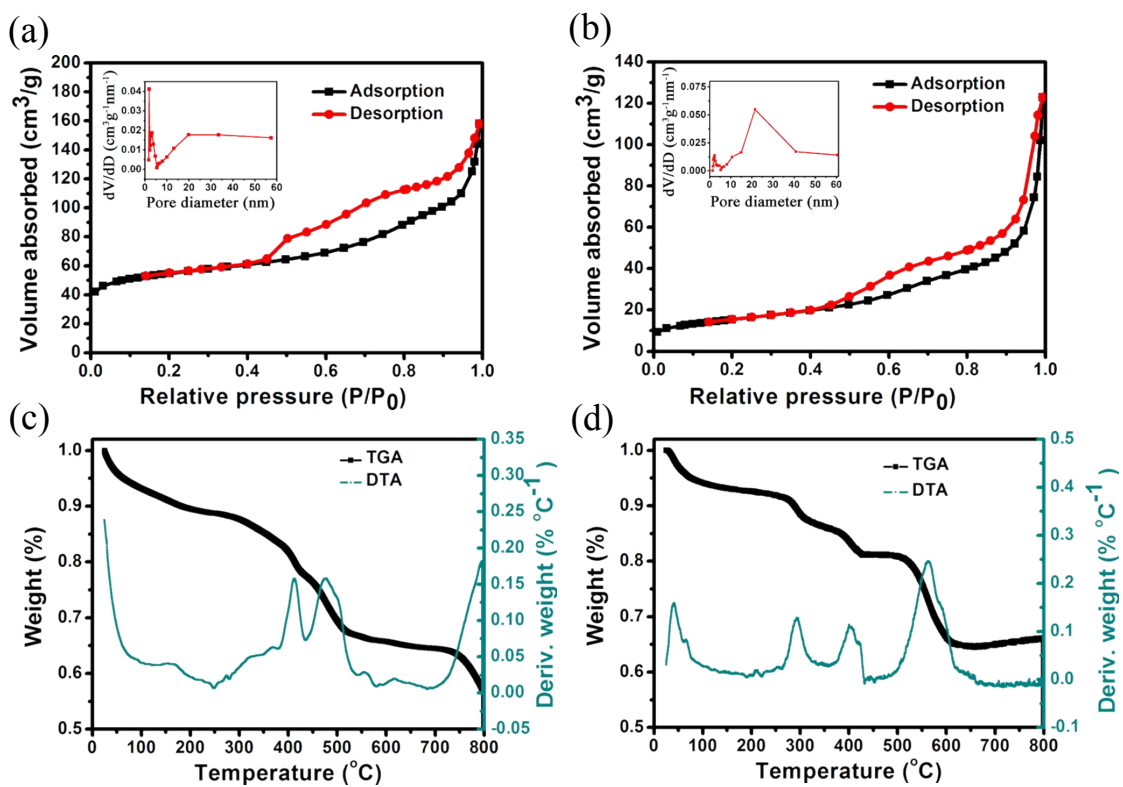

Fig. S3. nitrogen isothermal curve (a), pore size distribution curve (inset of a) and TGA/DTA curve (c) of  $\text{MoS}_2@ADC$ ; nitrogen isothermal curve (b), pore size distribution curve (inset of b) and TGA/DTA curve (d) of  $\text{CoMoS}_{3.13}@ADC$ .

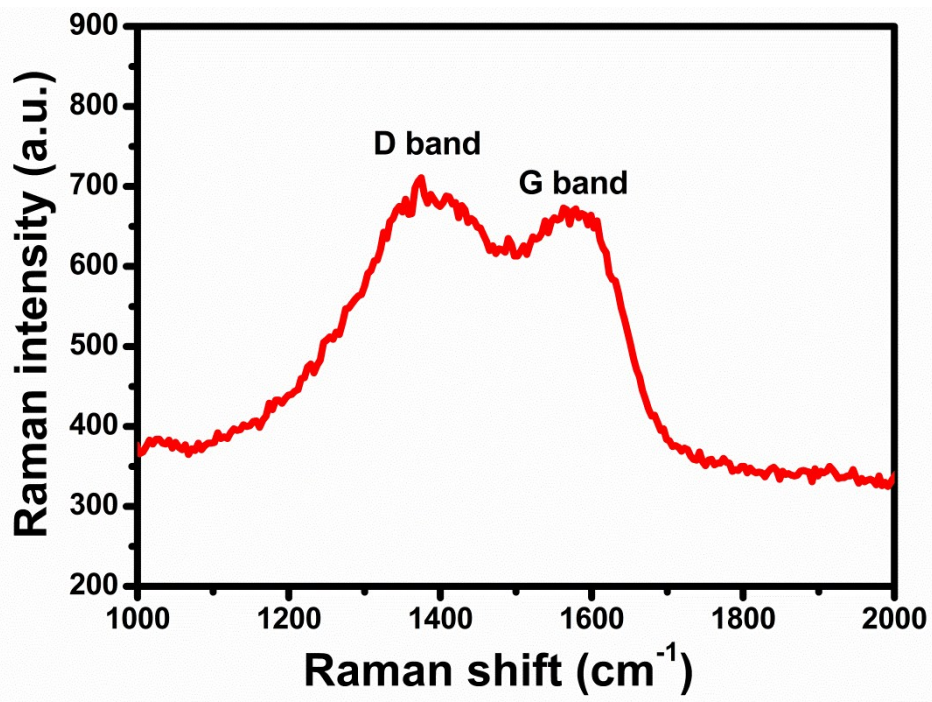

Fig. S4 Raman spectrum of CoMoS<sub>3.13</sub>@ADC in 1000~2000 cm<sup>-1</sup>

Table S1. Electrochemical performance of CoMoS<sub>3.13</sub>@ADC electrode with previously reported MoS<sub>2</sub>/carbon composite anodes

| Ref                 | Electrode                       | Initial discharge capacity<br>(100 mA g <sup>-1</sup> ) | Initial charge capacity<br>(100 mA g <sup>-1</sup> ) | Residual capacity<br>(100 mA g <sup>-1</sup> ) | Rate capacity<br>(1A g <sup>-1</sup> ) | Rate capacity<br>(2A g <sup>-1</sup> ) |
|---------------------|---------------------------------|---------------------------------------------------------|------------------------------------------------------|------------------------------------------------|----------------------------------------|----------------------------------------|
| <b>Our material</b> | <b>CoMoS<sub>3.13</sub>@ADC</b> | <b>1439</b>                                             | <b>1121</b>                                          | <b>1125</b>                                    | <b>800</b>                             | <b>755</b>                             |
| 1                   | MoS <sub>2</sub> /a-C-1.0       | 2100                                                    | 926                                                  | 961                                            |                                        |                                        |
| 2                   | MoS <sub>2</sub> /G (1:2)       | 1571                                                    | 1031                                                 | 1100                                           | 900                                    |                                        |
| 3                   | MoS <sub>2</sub> /N-G           | 1300                                                    | 1021.2                                               | 1285.3                                         | 850                                    |                                        |

## References

1. K. Chang, W. Chen, L. Ma, H. Li, H. Li, F. Huang, Z. Xu, Q. Zhang and J.-Y. Lee, *Journal of Materials Chemistry*, 2011, **21**, 6251-6257.
2. K. Chang and W. Chen, *ACS nano*, 2011, **5**, 4720-4728.
3. K. Chang, D. Geng, X. Li, J. Yang, Y. Tang, M. Cai, R. Li and X. Sun, *Advanced Energy Materials*, 2013, **3**, 839-844.
